# Supplementary material for: Influence of Social Media Usage, Academic Performance and Working Memory among Undergraduate Students
Source: Preprints.org preprint supplement (doi:10.20944/preprints202402.0601.v1), 2024-02-09
Supplement: Supplementary file 1 [file supplementary]

Supplementary Table S1 Responses of students on Academic Performance and Working Memory.

|  | **Frequency (N)** | **Percent (%)** |
| --- | --- | --- |
| **Academic Performance** | |  |
| Good Performance | 605 | 83.3 |
| Needs improvement (< 20) | 117 | 16.2 |
| **Subcategories for Working Memory** | |  |
| Storage Domain | |  |
| Good Performance | 690 | 95.6 |
| Needs improvement (> 25) | 32 | 4.4 |
| Attention Domain | |  |
| Good Performance | 677 | 93.8 |
| Needs improvement (> 25) | 45 | 6.2 |
| Executive Domain | |  |
| Good Performance | 690 | 95.6 |
| Needs improvement (> 25) | 32 | 4.4 |

Supplementary Table S2 Frequency distribution of students on Academic Performance and Working Memory based on Cities.

| Academic Performance | | | Tbilisi= 413 |  | Batumi= 309 |
| --- | --- | --- | --- | --- | --- |
|  | **N** | | **%** | **N** | **%** |
| Good Performance | | 353 | 85.5 | 252 | 81.6 |
| Needs improvement (< 20) | | 60 | 14.5 | 57 | 18.4 |
| Working Memory | | |  |  |  |
| **Subcategories for Working Memory**  Storage Domain | | |  |  |  |
| Good Performance | 396 | | 95.9 | 294 | 95.1 |
| Needs improvement (> 25) | 17 | | 4.1 | 15 | 4.9 |
| Attention Domain | | |  |  |  |
| Good Performance | 387 | | 93.7 | 290 | 93.9 |
| Needs improvement (> 25) | 26 | | 6.3 | 19 | 6.1 |
| Executive Domain | | |  |  |  |
| Good Performance | 396 | | 95.9 | 294 | 95.9 |
| Needs improvement (> 25) | 17 | | 4.1 | 15 | 4.9 |

Table S3 Universities Academic Performance and Working Memory

| **Academic Performance** | | **UG =300** |  | **BSU= 309** |  | **EEU= 113** |
| --- | --- | --- | --- | --- | --- | --- |
|  | **N** | **%** | **N** | **%** | **N** | **%** |
| Good Performance | 252 | 84.0 | 252 | 81.6 | 101 | 89.4 |
| Needs improvement (< 20) | 48 | 16 | 57 | 18.4 | 12 | 10.6 |
| Working Memory | |  |  |  |  |  |
| Storage Domain | |  |  |  |  |  |
| Good Performance | 287 | 95.7 | 294 | 95.1 | 109 | 96.5 |
| Needs improvement (> 25) | 13 | 4.3 | 15 | 4.9 | 4 | 3.5 |
| Attention Domain | |  |  |  |  |  |
| Good Performance | 278 | 92.7 | 290 | 93.9 | 109 | 96.5 |
| Needs improvement (> 25) | 22 | 7.3 | 19 | 6.1 | 4 | 3.5 |
| Executive Domain | |  |  |  |  |  |
| Good Performance | 287 | 95.7 | 294 | 95.1 | 109 | 96.5 |
| Needs improvement (> 25) | 13 | 4.3 | 15 | 4.9 | 4 | 3.5 |
